# Supplementary material
Source: MDPI journal article supplement (https://www.mdpi.com/2076-3417/13/20/11585)

## Supplementary Materials

# Piplartine Synthetic Analogs: In Silico Analysis and Antiparasitic Study against *Trypanosoma cruzi*

Rayanne H. N. Silva<sup>1</sup>, Emanuel P. Magalhães<sup>2</sup>, Rebeca C. Gomes<sup>1</sup>, Yunierkis Perez-Castillo<sup>3</sup>, Alice M. C. Martins<sup>2</sup> and Damião P. De Sousa<sup>1,\*</sup>

<sup>1</sup> Laboratory of Pharmaceutical Chemistry, Department of Pharmaceutical Sciences, Federal University of Paraíba, João Pessoa 58051-900, Paraíba, Brazil; rayanne\_nasci@hotmail.com (R.H.N.S.); rebecagomes123456@gmail.com (R.C.G.)

<sup>2</sup> Postgraduate Program in Pharmaceutical Sciences, Faculty of Pharmacy, Dentistry and Nursing, Federal University of Ceará, Fortaleza 60.430-370, Brazil; emanuelpmagalhaes@gmail.com (E.P.M.); martinsalice@gmail.com (A.M.C.M.)

<sup>3</sup> Facultad de Ingeniería y Ciencias Aplicadas, Área de Ciencias Aplicadas, Universidad de Las Américas, Quito 170516, Ecuador; yunierkis@gmail.com

\* Correspondence: damiao\_desousa@yahoo.com.br

**Abstract:** Neglected tropical diseases (NTDs) cause thousands of deaths each year. Among these diseases, we find Chagas disease, whose etiologic agent is *Trypanosoma cruzi*. Piplartine is an alkaloid present in various species of the genus *Piper* that possess trypanocidal activity. In this study, the antiparasitic potential of a collection of 23 synthetic analogs of piplartine against *Trypanosoma cruzi* was evaluated in vitro. The compounds were prepared via amidation and esterification reactions using 3,4,5-trimethoxybenzoic acid as starting material. The products were structurally characterized using <sup>1</sup>H and <sup>13</sup>C nuclear magnetic resonance, infrared spectroscopy, and high-resolution mass spectrometry. Of the twenty-three compounds tested in the cytotoxic activity assays, five presented good activity in the trypomastigote, epimastigote, and amastigote forms of *T. cruzi*, showing IC<sub>50</sub> values ranging from 2.21 to 35.30 μM, 4.06 to 34.30 μM, and 1.72 to 5.72 μM, respectively. *N*-iso-butyl-3,4,5-trimethoxybenzamide (**17**) presented potent trypanocidal activity with an IC<sub>50</sub> = 2.21 μM and selectively caused apoptosis (SI = 298.6). Molecular modeling experiments suggested the inhibitions of the histone deacetylase (HDAC) enzyme as the main trypanocidal mechanism of action of compound **17** in *T. cruzi*.

**Keywords:** piperlongumine; cytotoxicity; natural products; trypanocide; alkaloid; *Trypanosoma*; neglected diseases; antiparasitic activity

---

## 1. Experimental

### 1.1. Chemical Characterization Compounds 1-23

**Methyl 3,4,5-trimethoxybenzoate (1):** White crystalline solid; yield 94.9% (101.2 mg; 0.44 mmol); M.P.: 81–83 °C; TLC (8:2 Hexane/AcOEt),  $R_f$  = 0.46; IR  $\nu_{\text{max}}$  (KBr,  $\text{cm}^{-1}$ ): 3021, 2953; 1716, 1674, 1592 and 1467, 1338 and 1132, 1229 and 992, 863;  $^1\text{H}$  NMR (400 MHz,  $\text{CDCl}_3$ ):  $\delta$  7.29 (s, 2H); 3.89 (s, 12H).  $^{13}\text{C}$  NMR (100 MHz,  $\text{CDCl}_3$ ):  $\delta$  166.6; 152.8; 142.3; 125.2; 106.8; 60.9; 56.2; 52.2 [29].

**Ethyl 3,4,5-trimethoxybenzoate (2):** White solid; yield 94.6% (107.1 mg; 0.44 mmol); M.P.: 53–54 °C; TLC (8:2 Hexane/AcOEt),  $R_f$  = 0.52; IR  $\nu_{\text{max}}$  (KBr,  $\text{cm}^{-1}$ ): 3014, 2964, 1706, 1664, 1591 and 1456, 1332 and 1132, 1228 and 1042, 863;  $^1\text{H}$  NMR (400 MHz,  $\text{CDCl}_3$ ):  $\delta$  7.29 (s, 2H); 4.39 (q,  $J$  = 7.1 Hz, 2H); 3.90 (s, 6H); 3.89 (s, 3H); 1.39 (t,  $J$  = 7.1 Hz, 3H);  $^{13}\text{C}$  NMR (100 MHz,  $\text{CDCl}_3$ ):  $\delta$  166.2; 152.9; 142.1 125.4; 106.7; 61.1 ; 60.9; 56.4; 14.2 [28].

**Propyl 3,4,5-trimethoxybenzoate (3):** White crystalline solid; yield 99.1% (118.8 mg; 0.46 mmol); M.P.: 34–35 °C; TLC (8:2 Hexane/AcOEt),  $R_f$  = 0.56; IR  $\nu_{\text{max}}$  (KBr,  $\text{cm}^{-1}$ ): 3114, 2964, 1706, 1664, 1590 and 1459, 1333 and 1124, 1227 and 1008, 858;  $^1\text{H}$  NMR (400 MHz,  $\text{CDCl}_3$ ):  $\delta$  7.30 (s, 2H); 4.27 (t,  $J$  = 6.7 Hz, 2H); 3.93 (s, 9H); 1.79 (sext,  $J$  = 7.4 Hz, 2H); 1.02 (t,  $J$  = 7.4 Hz, 3H).  $^{13}\text{C}$  NMR (100 MHz,  $\text{CDCl}_3$ ):  $\delta$  166.1; 152.6; 142.1; 125.4; 106.6; 66.6; 60.9; 56.1; 22.0; 10.4 [29].

**Isopropyl 3,4,5-trimethoxybenzoate (4):** Light brown oil; yield 57.3% (68.6 mg; 0.26 mmol); TLC (8:2 Hexane/AcOEt),  $R_f$  = 0.56; IR  $\nu_{\text{max}}$  (KBr,  $\text{cm}^{-1}$ ): 3024, 2981, 1711, 1679, 1590 and 1461, 1327 and 1129, 1229 and 1007, 865;  $^1\text{H}$  NMR (400 MHz,  $\text{CDCl}_3$ ):  $\delta$  7.28 (s, 2H); 5.24 (sept,  $J$  = 2.2 Hz, 1H); 3.90 (s, 6H); 3.89 (s, 3H); 1.36 (d,  $J$  = 6.3 Hz, 6H);  $^{13}\text{C}$  NMR (100 MHz,  $\text{CDCl}_3$ ):  $\delta$  165.7; 152.8; 142.0; 125.9; 106.7; 68.6; 60.9; 56.2; 21.9 [28].

**Butyl 3,4,5-trimethoxybenzoate (5):** Colorless oil; yield 99.6% (125.9 mg; 0.46 mmol); TLC (8:2 Hexane/AcOEt),  $R_f$  = 0.64; IR  $\nu_{\text{max}}$  (KBr,  $\text{cm}^{-1}$ ): 3006, 2961, 1716, 1655, 1590 and 1459, 1335 and 1129, 1225 and 1006, 865;  $^1\text{H}$  NMR (500 MHz,  $\text{CDCl}_3$ ):  $\delta$  7.29 (s, 2H); 4.31 (t,  $J$  = 6.7 Hz, 2H); 3.90 (s, 6H); 3.90 (s, 3H); 1.76 (qu,  $J$  = 6.7 Hz, 2H); 1.47 (sext,  $J$  = 7.4 Hz, 2H); 0.98 (t,  $J$  = 7.3 Hz, 3H);  $^{13}\text{C}$  NMR (125 MHz,  $\text{CDCl}_3$ ):  $\delta$  166.4; 153.0 142.2; 125.7; 106.9; 65.3; 61.0; 56.4; 30.9; 19.4; 13.9 [28].

**Isopentyl 3,4,5-trimethoxybenzoate (6):** Brown oil, yield 45.3% (60.3 mg; 0.21 mmol); TLC (8:2 Hexane/AcOEt),  $R_f$  = 0.60; IR  $\nu_{\text{max}}$  (KBr,  $\text{cm}^{-1}$ ): 3002, 2959, 1717, 1655, 1590 and 1459, 1334 and 1129, 1225 and 1006, 865;  $^1\text{H}$  NMR (400 MHz,  $\text{CDCl}_3$ ):  $\delta$  7.29 (s, 2H); 4.34 (t,  $J$  = 6.8 Hz, 2H); 3.90 (s, 9H); 1.81-1.71 (m, 1H); 1.66 (q,  $J$  = 6.8 Hz, 2H); 0.98 (d,  $J$  = 6.6 Hz, 6H);  $^{13}\text{C}$  NMR (100 MHz,  $\text{CDCl}_3$ ):  $\delta$  166.5; 153.0; 142.3; 125.7; 107.0; 64.1 61.0; 56.4; 37.6; 25.5; 22.6 [11].

**Pentyl 3,4,5-trimethoxybenzoate (7):** White oil; yield 75.2% (100.1 mg; 0.35 mmol); TLC (8:2 Hexane/AcOEt),  $R_f$  = 0.60; IR  $\nu_{\text{max}}$  (KBr,  $\text{cm}^{-1}$ ): 3012, 2957, 1714, 1657, 1590 and 1461, 1335 and 1129, 1226 and 1006, 865;  $^1\text{H}$  NMR (400 MHz,  $\text{CDCl}_3$ ):  $\delta$  7.29 (s, 2H); 4.29 (t,  $J$  = 6.8 Hz, 2H); 3.89 (s, 9H); 1.75 (qu,  $J$  = 7.2 Hz, 2H); 1.44–1.34 (m, 4H); 0.92 (t,  $J$  = 7.0 Hz, 3H);  $^{13}\text{C}$  NMR (100 MHz,  $\text{CDCl}_3$ ):  $\delta$  166.3 (C=O); 152.9 (C-3, C-5); 142.1 (C-4); 125.5 (C-1); 106.8; 65.3; 60.9; 56.2; 28.4; 28.2; 22.3; 14.0 [28].

**Decyl 3,4,5-trimethoxybenzoate (8):** Amorphous solid, yield 40.6% (67.4 mg; 0.19 mmol); M.P.: 49–50 °C; TLC (8:2 Hexane/AcOEt),  $R_f$  = 0.64; IR  $\nu_{\text{max}}$  (KBr,  $\text{cm}^{-1}$ ): 3015, 2956, 1709, 1672, 1590 and 1465, 1336 and 1131, 1226 and 990, 864;  $^1\text{H}$  NMR (400 MHz,  $\text{CDCl}_3$ ):  $\delta$  7.29 (s, 2H); 4.30 (t,  $J$  = 6.8 Hz, 2H); 3.90 (s, 9H); 1.80 (qu,  $J$  = 6.8 Hz, 2H); 1.42–1.26 (m, 14H); 0.87 (t,  $J$  = 7.0 Hz, 3H);  $^{13}\text{C}$  NMR (100 MHz,  $\text{CDCl}_3$ ):  $\delta$  166.2; 152.6; 142.0; 125.4; 106.4; 65.3; 60.8; 56.2; 31.8; 29.5; 29.3; 29.3; 28.7; 26.0; 22.7; 14.1 [30].

**4-Methoxy-benzyl 3,4,5-trimethoxybenzoate (10):** White crystalline solid, yield 67.5% (105.7 mg; 0.32

mmol); M.P.: 83–84 °C; TLC (8:2 Hexane/AcOEt),  $R_f$  = 0.36; IR  $\nu_{\text{max}}$  (KBr,  $\text{cm}^{-1}$ ): 3008, 2944, 1711, 1670, 1589 and 1465, 1332 and 1126, 1228 and 1005, 864;  $^1\text{H}$  NMR (400 MHz,  $\text{CDCl}_3$ ):  $\delta$  7.38 (*d*,  $J$  = 9.5 Hz, 2H); 7.31 (*s*, 2H, H-2); 6.91 (*d*,  $J$  = 8.8 Hz, 2H); 5.29 (*s*, 2H); 3.89 (*s*, 9H); 3.81 (*s*, 3H);  $^{13}\text{C}$  NMR (100 MHz,  $\text{CDCl}_3$ ):  $\delta$  166.2; 159.6; 152.8, 142.1; 130.0; 128.2; 125.2; 113.9 ; 106.9; 66.7; 60.9; 56.1; 55.3 [11].

**Benzyl 3,4,5-trimethoxybenzoate (12)** White solid; yield 29.8% (84.9 mg; 0.28 mmol); M.P.: 91–92 °C; TLC (8:2 Hexane/AcOEt),  $R_f$  = 0.38; IR  $\nu_{\text{max}}$  (KBr,  $\text{cm}^{-1}$ ): 3006, 2944, 1698, 1634, 1583 and 1467, 1340 and 1128, 1249 and 1040, 818;  $^1\text{H}$  NMR (400 MHz,  $\text{CDCl}_3$ ):  $\delta$  7.46 – 7.42 (*m*, 2H); 7.38 (*m*, 3H); 7.33 (*s*, 2H); 5.36 (*s*, 2H); 3.90 (*s*, 9H);  $^{13}\text{C}$  NMR (100 MHz,  $\text{CDCl}_3$ ):  $\delta$  166.2; 153.0; 142.4; 136.2; 128.7; 128.3; 128.3; 125.2; 107.1; 66.9; 61.0; 56.4 [28].

**4-Bromo-benzyl 3,4,5-trimethoxybenzoate (13)**: White crystalline solid, yield 55.0% (197.0 mg; 0.51 mmol); M.P.: 104–105 °C; TLC (8:2 Hexane/AcOEt),  $R_f$  = 0.62; IR  $\nu_{\text{max}}$  (KBr,  $\text{cm}^{-1}$ ): 3034, 2958, 1712, 1664, 1594 and 1454, 1334 and 1133, 1228 and 1010, 1070, 801;  $^1\text{H}$  NMR (500 MHz,  $\text{CDCl}_3$ ):  $\delta$  7.51 (*d*,  $J$  = 8.4 Hz, 2H); 7.32 (*d*,  $J$  = 8.4 Hz, 2H); 7.31 (*s*, 2H); 5.30 (*s*, 2H); 3.90 (*s*, 9H);  $^{13}\text{C}$  NMR (125 MHz,  $\text{CDCl}_3$ ):  $\delta$  166.1; 153.1; 142.7; 135.2; 131.9; 130.0; 125.0; 122.5; 107.2; 66.2; 61.1; 56.4 [11].

**2-Methylnaphthalene 3,4,5-trimethoxybenzoate (14)**: White solid; yield 48.4% (160.9 mg; 0.45 mmol); M.P.: 84–85 °C; TLC (8:2 Hexane/AcOEt),  $R_f$  = 0.58; IR  $\nu_{\text{max}}$  (KBr,  $\text{cm}^{-1}$ ): 3002, 2936, 1714, 1670, 1590 and 1463, 1329 and 1129, 1225 and 1008, 864;  $^1\text{H}$  NMR (500 MHz,  $\text{CDCl}_3$ ):  $\delta$  7.91–7.85 (*m*, 4H); 7.55 (*dd*,  $J$  = 8.4 Hz; 1.6 Hz, 1H), 7.53–7.45 (*m*, 2H); 7.36 (*s*, 2H); 5.53 (*s*, 2H); 3.90 (*s*, 9H);  $^{13}\text{C}$  NMR (125 MHz,  $\text{CDCl}_3$ ):  $\delta$  166.3; 153.1; 142.5; 133.6; 133.3; 133.3; 128.6; 128.12 127.8; 127.5; 126.4; 126.4; 126.0; 125.2; 107.2; 67.1; 61.0; 56.4 [11].

**Diphenyl 3,4,5-trimethoxybenzoate (15)**: Yellow solid; yield 41.5% (148.2 mg; 0.39 mmol); M.P.: 57–58 °C; TLC (8:2 Hexane/AcOEt),  $R_f$  = 0.64; IR  $\nu_{\text{max}}$  (KBr,  $\text{cm}^{-1}$ ): 3026, 2939, 1727, 1655, 1587 and 1456, 1338 and 1172, 1226 and 1127, 855;  $^1\text{H}$  NMR (500 MHz,  $\text{CDCl}_3$ ):  $\delta$  7.59–7.47 (*m*, 12H); 7.44 (*s*, 1H); 4.06 (*s*, 9H);  $^{13}\text{C}$  NMR (125 MHz,  $\text{CDCl}_3$ ):  $\delta$  165.3; 152.9; 142.5; 140.2; 128.6\*; 128.5\*; 128.0\*; 127.5\*; 127.1; 126.5; 125.2; 107.1; 77.6; 60.9; 56.3 [11].

**N-Butyl-3,4,5-trimethoxybenzamide (16)**: White solid; yield 89.1% (112.2 mg; 0.41 mmol); M.P.: 115–116 °C; TLC (6:4 Hexane/AcOEt),  $R_f$  = 0.36; IR  $\nu_{\text{max}}$  (KBr,  $\text{cm}^{-1}$ ): 3294, 3017, 2932, 1681, 1634, 1583 and 1459, 1541 and 1506, 1236 and 1131, 843;  $^1\text{H}$  NMR (400 MHz,  $\text{CDCl}_3$ ):  $\delta$  6.98 (*s*, 2H); 6.22 (*s*, 1H); 3.87 (*s*, 6H); 3.86 (*s*, 3H); 3.43 (*q*,  $J$  = 5.8 Hz, 2H); 1.62 (*qu*,  $J$  = 7.2 Hz, 2H); 1.38 (*sext*,  $J$  = 7.5 Hz, 2H); 0.94 (*t*,  $J$  = 7.3 Hz, 3H);  $^{13}\text{C}$  NMR (100 MHz,  $\text{CDCl}_3$ ):  $\delta$  167.3; 153.2; 140.8; 130.5; 104.5; 60.9; 56.3; 40.0; 31.9; 20.2; 13.9 [30].

**N-Isobutyl-3,4,5-trimethoxybenzamide (17)**: Yellow solid; yield 91.3% (115.0 mg; 0.43 mmol); M.P.: 118–119 °C; TLC (6:4 Hexane/AcOEt),  $R_f$  = 0.36 ; IR  $\nu_{\text{max}}$  (KBr,  $\text{cm}^{-1}$ ): 3307, 3015, 2955, 1687, 1634, 1583 and 1469, 1543 and 1504, 1237 and 1131, 842;  $^1\text{H}$  NMR (500 MHz,  $\text{CDCl}_3$ ):  $\delta$  6.98 (*s*, 2H), 6.30 (*s*, 1H), 3.86 (*s*, 6H), 3.85 (*s*, 3H); 3.24 (*t*,  $J$  = 6.5 Hz, 2H), 1.92–1.84 (*m*, 1H), 0.95 (*d*,  $J$  = 6.7 Hz, 6H).  $^{13}\text{C}$  NMR (125 MHz,  $\text{CDCl}_3$ ):  $\delta$  167.5; 153.3; 140.7; 130.4; 104.5; 60.9; 56.4; 47.6; 28.7; 20.2 [30].

**N-Pyrrolidyl-3,4,5-trimethoxybenzamide (18)**: Yellow oil; yield 84.2% (105.3 mg; 0.39 mmol); TLC (1:9 Hexane/AcOEt),  $R_f$  = 0.48; IR  $\nu_{\text{max}}$  (KBr,  $\text{cm}^{-1}$ ): 3038, 2971, 1657, 1621, 1582 and 1463, 1510 and 1417, 1239 and 1005, 843;  $^1\text{H}$  NMR (400 MHz,  $\text{CDCl}_3$ ):  $\delta$  6.71 (*s*, 2H); 3.83 (*s*, 6H); 3.82 (*s*, 3H); 3.59 (*t*,  $J$  = 6.1 Hz, 2H); 3.42 (*d*,  $J$  = 5.8 Hz, 2H); 1.92 (*m*, 2H); 1.86 (*m*, 2H);  $^{13}\text{C}$  NMR (100 MHz,  $\text{CDCl}_3$ ):  $\delta$  169.4; 152.9; 139.2; 132.1; 104.6; 60.8; 56.2; 49.8; 46.2; 26.3; 24.4 [31].

**N-Cyclohexyl-3,4,5-trimethoxybenzamide (19):** White crystalline solid; yield 44.4% (61.4 mg; 0.21 mmol); M.P.: 179–180 °C; TLC (6:4 Hexane/AcOEt), *R*<sub>f</sub> = 2.2; IR  $\nu_{\text{max}}$  (KBr,  $\text{cm}^{-1}$ ): 3468, 3077, 2871, 1677, 1621, 1582 and 1463, 1510 and 1417, 1239 and 1004, 844;  $^1\text{H}$  NMR (500 MHz,  $\text{DMSO-d}_6$ ):  $\delta$  7.16 (s, 1H); 6.19 (s, 2H); 2.86 (s, 6H); 2.72 (s, 3H); 1.54 (*qu*  $J$  = 1.8 Hz, 1H); 0.88–0.76 (*m*, 4H); 0.67–0.62 (*m*, 2H); 0.36–0.32 (*m*, 4H);  $^{13}\text{C}$  NMR (125 MHz,  $\text{DMSO-d}_6$ ):  $\delta$  164.9; 152.5; 139.8; 130.1; 104.9; 60.2; 56.1; 48.6; 32.6; 25.4; 25.1 [26].

**N-4-Hydroxybenzyl-3,4,5-trimethoxybenzamide (20):** White solid, yield 57.1% (256.3 mg; 0.81 mmol); M.P.: 227–229 °C; TLC (5:5 Hexane/AcOEt), *R*<sub>f</sub> = 0.37; IR  $\nu_{\text{max}}$  (KBr,  $\text{cm}^{-1}$ ): 3379 and 3314, 3346, 3019, 2099, 1634, 1611, 1574 and 1449, 1545 and 1499, 1414 and 1231, 1211 and 1122, 823;  $^1\text{H}$  NMR (400 MHz,  $\text{DMSO-d}_6$ ):  $\delta$  8.40 (s, 1H); 7.99 (*t*,  $J$  = 5.7 Hz, 1H); 6.35 (s, 2H); 6.24 (*d*,  $J$  = 8.5 Hz, 2H); 5.82 (*d*,  $J$  = 10.0 Hz, 2H); 3.48 (*d*,  $J$  = 5.7 Hz, 2H); 2.93 (s, 6H); 2.81 (s, 3H);  $^{13}\text{C}$  NMR (100 MHz,  $\text{DMSO-d}_6$ ):  $\delta$  165.4; 156.3; 152.6; 139.9; 129.8; 129.6; 128.6; 115.0; 104.8; 60.1; 56.0; 42.3 [26].

**N-Benzyl-3,4,5-trimethoxybenzamide (21):** White crystalline solid, yield 59.6% (84.6 mg; 0.27 mmol); M.P.: 138–139 °C; TLC (6:4 Hexane/AcOEt), *R*<sub>f</sub> = 0.38; IR  $\nu_{\text{max}}$  (KBr,  $\text{cm}^{-1}$ ): 3305, 3028, 2942, 1655, 1625, 1580 and 1459, 1528 and 1499, 1237 and 1127, 840;  $^1\text{H}$  NMR (400 MHz,  $\text{CDCl}_3$ ):  $\delta$  7.35–7.27 (*m*, 5H); 7.03 (s, 2H); 6.60 (s, 1H); 4.61 (*d*,  $J$  = 5.8 Hz, 2H); 3.86 (s, 3H); 3.85 (s, 6H);  $^{13}\text{C}$  NMR (100 MHz,  $\text{CDCl}_3$ ):  $\delta$  167.1; 153.3; 141.1; 138.2; 129.8; 128.8; 128.0; 127.7; 104.5; 61.0; 56.3; 44.3 [28].

**N-(4-Fluorobenzyl)-3,4,5-trimethoxybenzamide (22):** White crystalline solid, yield 62.5% (90 mg; 0.28 mmol); M.P.: 131–132 °C; TLC (6:4 Hexane/AcOEt), *R*<sub>f</sub> = 0.34; IR  $\nu_{\text{max}}$  (KBr,  $\text{cm}^{-1}$ ): 3288, 3012, 2947, 1672, 1634, 1585 and 1459, 1545 and 1508, 1280 and 1130, 1219 and 1098, 827;  $^1\text{H}$  NMR (400 MHz,  $\text{CDCl}_3$ ):  $\delta$  7.29–7.27 (*m*, 2H); 7.01 (s, 2H); 6.98 (*d*,  $J$  = 8.7 Hz, 2H); 6.69 (s, 1H); 4.55 (*d*,  $J$  = 5.8 Hz, 2H); 3.85 (s, 6H); 3.84 (s, 3H);  $^{13}\text{C}$  NMR (100 MHz,  $\text{CDCl}_3$ ):  $\delta$  167.1; 163.5; 161.0; 153.3; 141.2; 134.0; 129.7; 129.6\*; 129.5\*; 115.7\*; 115.5\*; 104.5; 60.9; 56.3; 43.5 [11].

\*, # Interchangeable.

**N-4-Chlorobenzyl-3,4,5-trimethoxybenzamide (23):** White solid; yield 86.6% (137.0 mg; 0.41 mmol); M.P.: 157–158 °C; TLC (6:4 Hexane/AcOEt), *R*<sub>f</sub> = 0.34; IR  $\nu_{\text{max}}$  (KBr,  $\text{cm}^{-1}$ ): 3254, 3004, 2946, 1653, 1629, 1582 and 1457, 1538 and 1498, 1235 and 1128, 1070 and 997, 816;  $^1\text{H}$  NMR (500 MHz,  $\text{CDCl}_3$ ):  $\delta$  7.31 (*d*,  $J$  = 6.4 Hz, 2H); 7.28 (*d*,  $J$  = 6.4 Hz, 2H); 7.04 (s, 2H); 6.74 (s, 1H); 4.58 (*d*,  $J$  = 5.7 Hz, 2H); 3.88 (s, 3H); 3.87 (s, 6H);  $^{13}\text{C}$  NMR (125 MHz,  $\text{CDCl}_3$ ):  $\delta$  167.3; 153.1; 141.3; 136.9; 133.4; 129.0; 129.3; 128.9; 104.5; 61.0; 56.4; 43.5 [11].

**Table S1.** Predicted free energies of binding of compound **17** to its potential targets and its components according to the MM-PBSA method. Energy values are expressed in kcal/mol.

| Target | Conformer | MM-PBSA Component |        |       |         |         |                               | $\Delta\text{G}_{\text{sol.}}$ | $\Delta\text{G}_{\text{TOTAL}}$ |
|--------|-----------|-------------------|--------|-------|---------|---------|-------------------------------|--------------------------------|---------------------------------|
|        |           | VD<br>WAALS       | EEL    | EPB   | ENPOLAR | EDISPER | $\Delta\text{G}_{\text{gas}}$ |                                |                                 |
| PPI-1  | 1         | -26.27            | -11.09 | 22.17 | -21.32  | 34.07   | -37.37                        | 34.93                          | -2.44                           |
|        | 2         | -24.81            | -6.47  | 17.67 | -20.05  | 32.35   | -31.28                        | 29.97                          | -1.32                           |
|        | 3         | -27.55            | -9.61  | 21.26 | -22.36  | 35.68   | -37.16                        | 34.58                          | -2.58                           |
| PPI-2  | 1         | -27.81            | -6.67  | 16.97 | -20.73  | 34.32   | -34.48                        | 30.56                          | -3.91                           |
| HDAC   | 1         | -34.99            | -69.76 | 56.70 | -31.23  | 47.45   | -104.75                       | 72.92                          | -31.83                          |
|        | 2         | -29.75            | -72.57 | 55.11 | -30.34  | 44.65   | -102.31                       | 69.42                          | -32.89                          |

|               |   |        |        |       |        |       |         |       |        |
|---------------|---|--------|--------|-------|--------|-------|---------|-------|--------|
|               | 3 | -31.58 | -79.12 | 62.66 | -31.32 | 46.98 | -110.70 | 78.32 | -32.37 |
| MAPK-1        | 1 | -42.84 | -25.04 | 49.09 | -29.58 | 49.04 | -67.88  | 68.55 | 0.67   |
|               | 1 | -33.18 | -11.31 | 31.36 | -25.17 | 43.21 | -44.48  | 49.40 | 4.92   |
| MAPK-2        | 2 | -35.28 | -21.90 | 40.14 | -27.57 | 44.64 | -57.18  | 57.21 | 0.03   |
|               | 3 | -33.03 | -17.00 | 37.16 | -26.20 | 43.98 | -50.04  | 54.94 | 4.90   |
|               | 4 | -34.85 | -30.36 | 48.42 | -27.39 | 44.43 | -65.21  | 65.47 | 0.26   |
| IleRS         | 1 | -42.36 | -14.22 | 45.97 | -29.00 | 50.09 | -56.58  | 67.06 | 10.49  |
| TUB           | 1 | -41.78 | -17.70 | 45.11 | -29.34 | 50.14 | -59.48  | 65.91 | 6.42   |
|               | 1 | -35.10 | -10.08 | 25.52 | -27.37 | 43.94 | -45.19  | 42.09 | -3.09  |
| PDE           | 2 | -39.00 | -16.30 | 30.73 | -29.48 | 47.72 | -55.30  | 48.97 | -6.32  |
| DHFR-TS       | 1 | -34.62 | -11.50 | 33.96 | -26.30 | 43.97 | -46.12  | 51.63 | 5.51   |
| (folate site) | 2 | -33.64 | -11.21 | 31.63 | -25.91 | 42.97 | -44.85  | 48.70 | 3.85   |
| DHFR-TS       | 1 | -28.99 | -18.86 | 36.58 | -22.87 | 39.28 | -47.84  | 52.99 | 5.14   |
| (dUMP site)   | 2 | -26.50 | -9.58  | 22.43 | -21.60 | 34.05 | -36.07  | 34.87 | -1.20  |

**Figure S1.** Infrared spectrum (KBr, cm<sup>-1</sup>) of N-Isobutyl-3,4,5-trimethoxybenzamide (17).

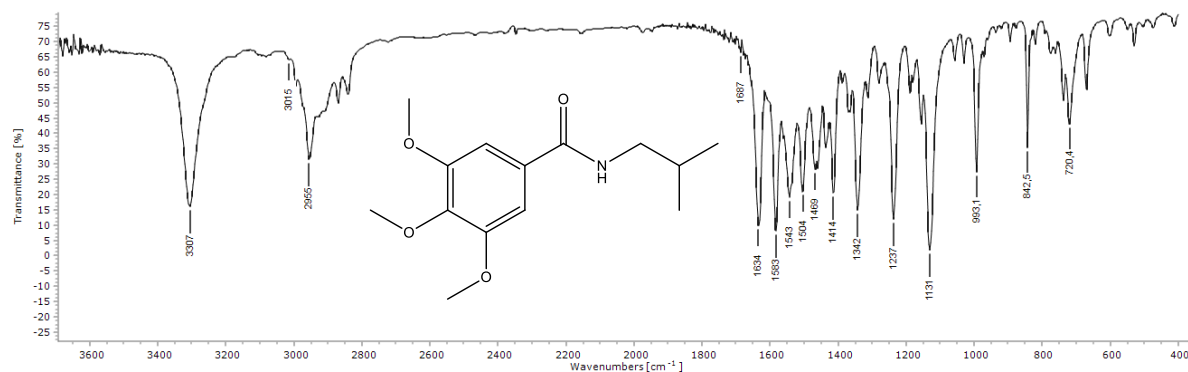

**Figure S2.**  $^1\text{H}$  NMR spectrum of N-Isobutyl-3,4,5-trimethoxybenzamide (**17**), ( $\text{CDCl}_3$ , 500 MHz).

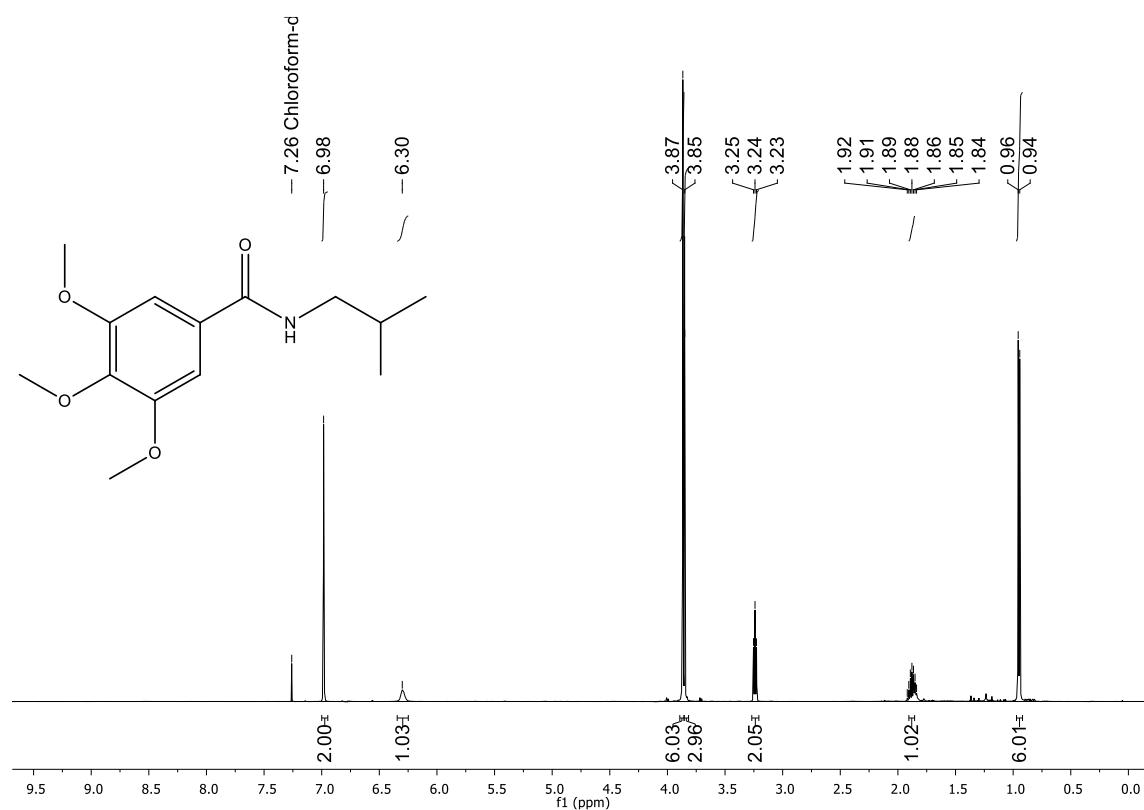

**Figure S3.**  $^1\text{H}$  NMR spectrum expansion of N-Isobutyl-3,4,5-trimethoxybenzamide (**17**), ( $\text{CDCl}_3$ , 500 MHz).

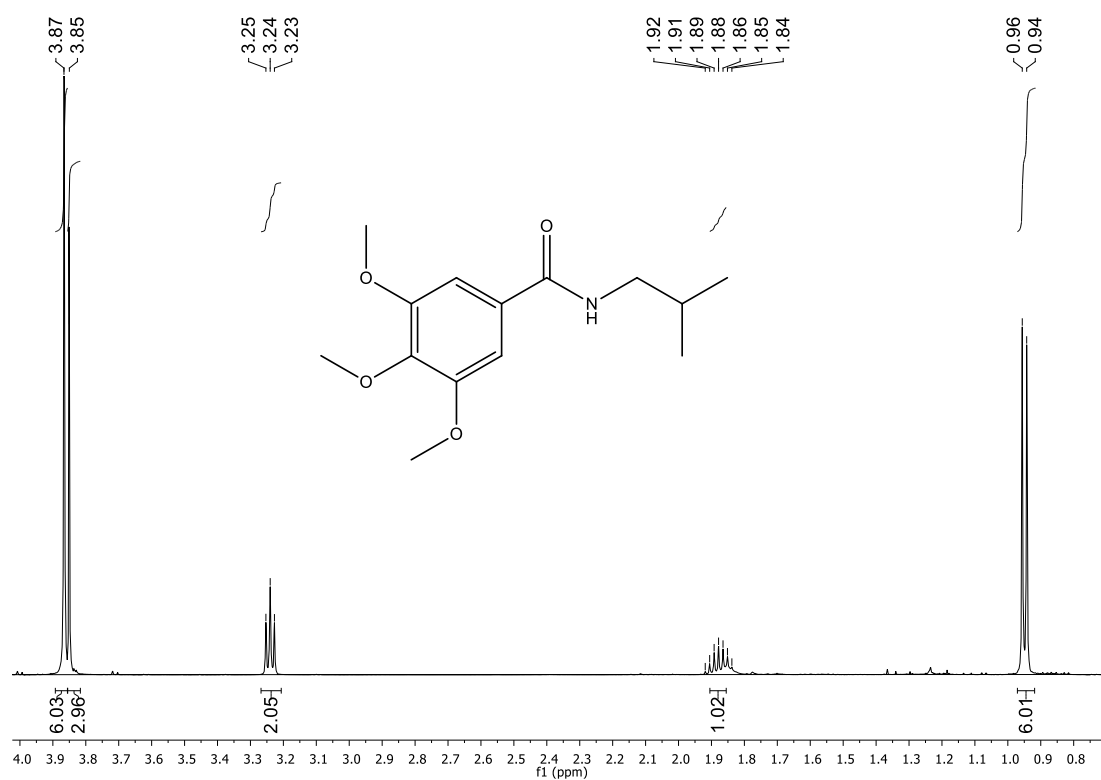

**Figure S4.**  $^{13}\text{C}$ -APT NMR spectrum of N-Isobutyl-3,4,5-trimethoxybenzamide (**17**), ( $\text{CDCl}_3$ , 100 MHz).

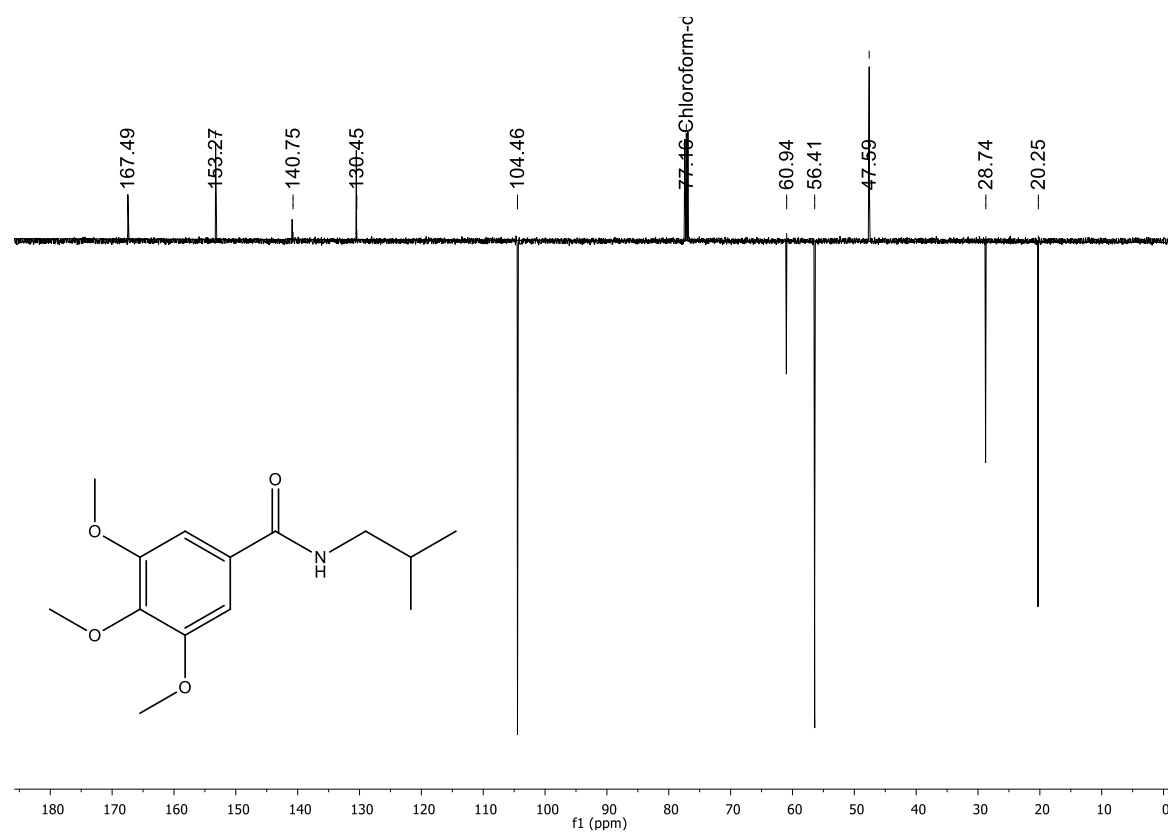

Supplement: s1 [file s1]
